# Supplementary material
Source: publisher figshare collection journal article supplement (https://acs.figshare.com/ndownloader/files/8610769)
Supplement: Supplementary file 1 [file 8610769]

# Supporting Information

## **A Bifunctional Iridium Catalyst Modified for Persistent Hydrogen Generation from Formic Acid: Understanding Deactivation via Cyclometalation of a 1,2-Diphenylethylenediamine Motif**

Asuka Matsunami<sup>1</sup>, Shigeki Kuwata<sup>1,2</sup>, and Yoshihito Kayaki\*<sup>1</sup>

<sup>1</sup>Department of Chemical Science and Engineering, School of Materials and Chemical Technology, Tokyo Institute of Technology, 2-12-1-E4-1 O-okayama, Meguro-ku Tokyo 152-8552, Japan

<sup>2</sup>PRESTO, Japan Science and Technology Agency (JST), 4-1-8 Honcho, Kawaguchi, Saitama 332-0012, Japan

\*E-mail for Y. K.: [ykayaki@o.cc.titech.ac.jp](mailto:ykayaki@o.cc.titech.ac.jp).

### **Contents**

|                                                                                    | Page |
|------------------------------------------------------------------------------------|------|
| General information                                                                | S2   |
| Representative procedures for the catalytic evolution of hydrogen from formic acid | S3   |
| Preparation and characterization data for Ir complexes                             | S4   |
| X-ray structure determination                                                      | S6   |
| NMR spectra of iridium complexes                                                   | S12  |
| Reference                                                                          | S24  |

### **General information**

All manipulations of oxygen and moisture-sensitive materials were performed under a purified argon atmosphere using standard Schlenk techniques. Solvents and formic acid were purchased from Kanto Chemical Co., Inc. and dried by refluxing over sodium benzophenone ketyl (1,2-dimethoxyethane) or B<sub>2</sub>O<sub>3</sub> (formic acid), and distilled under argon before use. Deionized water was produced by a Millipore Elix 3 system. THF-*d*<sub>8</sub> was degassed by three freeze-pump-thaw cycles and purified by trap-to-trap distillation after being dried with CaH<sub>2</sub>. The Ir (**1a**, **1b**) complexes derived from TfDPEN were prepared according to our previous paper<sup>1</sup>. <sup>1</sup>H (399.8 MHz), <sup>19</sup>F (376.2 MHz), and <sup>13</sup>C{<sup>1</sup>H} (100.5 MHz) NMR were recorded on a JEOL JNM-ECX400 spectrometer at 25 °C. The NMR chemical shifts were referenced to an external tetramethylsilane signal (0.0 ppm) by using the signals of residual proton impurities in the deuterated solvents for <sup>1</sup>H and <sup>13</sup>C, and referenced to an external CF<sub>3</sub>CO<sub>2</sub>H signal (-76.5 ppm) for <sup>19</sup>F NMR. Abbreviations for NMR are as follows: s = singlet, d = doublet, t = triplet, q = quartet, sept = septet, m = multiplet, or br = broad.

### Representative procedures for the catalytic evolution of hydrogen from formic acid

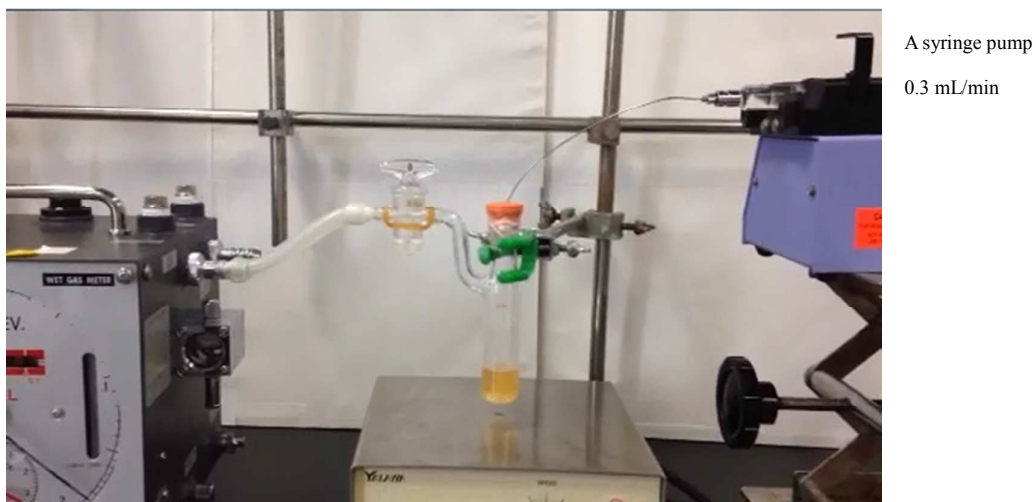

**Figure S1.** The experimental set up

To a solution of the iridium catalyst **1b** (20.9 mg, 0.030 mmol) in DME (3 mL) and degassed water (3 mL), formic acid was added for 10 min by using a syringe pump (0.3 mL/min). Using a mass-flowmeter, the rate of the gas evolution amount was measured.

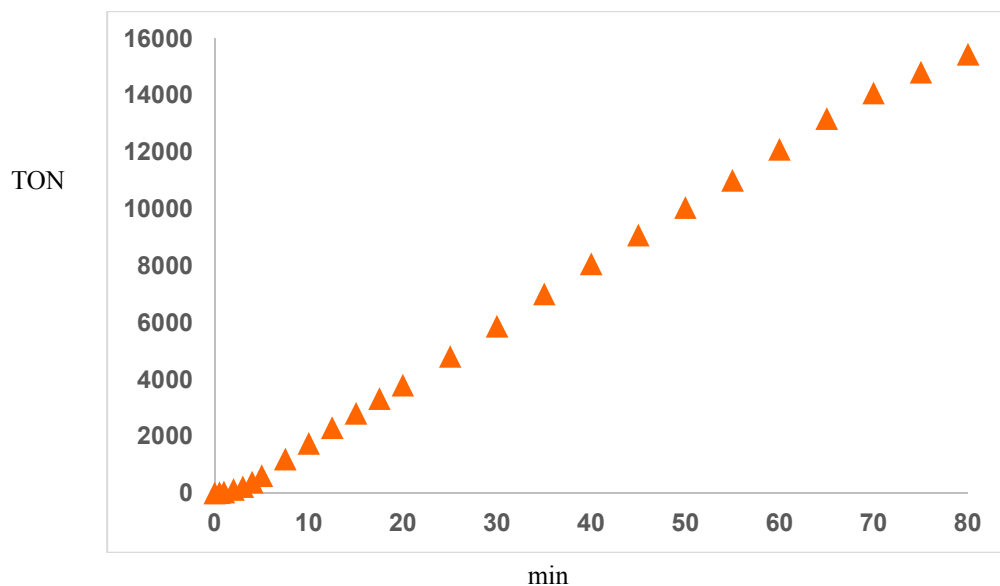

S/C =  $1.59 \times 10^4$  (**5a** 0.01 mmol, HCOOH 6 mL (0.075 mL/min), DME 6 mL, H<sub>2</sub>O 6 mL)

**Figure S2.** Time versus TON plots for the catalytic acceptorless dehydrogenation from formic acid using complex **5b** at 60 °C.

## Preparation and characterization data for Ir complexes

### Thermal transformation of the hydrido-iridium complex **1b** to iridacycles **2** and **3**

<in DME>

A solution of the hydrido-iridium complex **1b** (139.3 mg, 0.207 mmol) in DME (10 mL) was stirred under reflux conditions for 38 h. After the removal of the solvent, the crude product (**2:3** = 82:18, determined by  $^1\text{H}$  NMR) was purified by silica gel flash column chromatography (eluted with hexane and diethyl ether (1:2); TLC information:  $R_f$  = 0.33 for **2**, and  $R_f$  = 0.22 for **3**) to give the pure complexes **2** (56.5 mg, 0.084 mmol, 41% isolated yield).

<in DME/H<sub>2</sub>O mixed solvent>

A solution of the hydrido-iridium complex **1b** (149.8 mg, 0.223 mmol) in DME and water mixed solvent (each 5 mL) was stirred at 80 °C for 50 min. After the removal of the DME, dichloromethane (15 mL) was introduced and water layer was separated. The crude product (129.3 mg, 0.193 mmol, 87% crude yield; **2:3** = 14:86, determined by  $^1\text{H}$  NMR) was purified by silica gel flash column chromatography (eluted with hexane and diethyl ether (1:2)) to give the pure complexes **3** (98.4 mg, 0.147 mmol, 66% isolated yield).

#### *Cp\*Ir[ $\kappa^3$ (*N,N'*,*C*)-(S,S)-NH<sub>2</sub>CHPhCHNTfC<sub>6</sub>H<sub>4</sub>)] (**2**)*

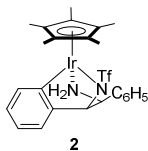

$^1\text{H}$  NMR (THF-*d*<sub>8</sub>, r.t.):  $\delta$  1.85 (s, 15H; C<sub>5</sub>(CH<sub>3</sub>)<sub>5</sub>), 3.13 (d,  $^3J_{\text{HH}} = 8.4$  Hz, 1H; NH<sub>2</sub>CHPhCHNTfC<sub>6</sub>H<sub>4</sub>), 3.78 (d,  $^3J_{\text{HH}} = 10.6$  Hz, 1H; NH<sub>2</sub>CHPhCHNTfC<sub>6</sub>H<sub>4</sub>), 4.75 (s, 1H; NH<sub>2</sub>CHPhCHNTfC<sub>6</sub>H<sub>4</sub>), 4.97 (br, 1H; NH<sub>2</sub>CHPhCHNTfC<sub>6</sub>H<sub>4</sub>), 6.80-6.85 (m, 2H; aryl), 7.14-7.17 (m, 1H; aryl), 7.21-7.25 (m, 1H; aryl), 7.29-7.32 (m, 2H; aryl), 7.36-7.38 (m, 2H; aryl), 7.74-7.76 (m, 1H; aryl);  $^{19}\text{F}$  NMR (THF-*d*<sub>8</sub>, r.t.):  $\delta$  -76.2 (s, CF<sub>3</sub>);  $^{13}\text{C}\{^1\text{H}\}$  NMR (CD<sub>2</sub>Cl<sub>2</sub>, r.t.):  $\delta$  9.02 (C<sub>5</sub>(CH<sub>3</sub>)<sub>5</sub>), 54.4 (NH<sub>2</sub>CHC<sub>6</sub>H<sub>5</sub>CHNTfC<sub>6</sub>H<sub>4</sub>), 78.0 (NH<sub>2</sub>CHC<sub>6</sub>H<sub>5</sub>CHNTfC<sub>6</sub>H<sub>4</sub>), 86.9 (C<sub>5</sub>(CH<sub>3</sub>)<sub>5</sub>), 120.7 (q,  $^1J_{\text{CF}} = 327.8$  Hz; CF<sub>3</sub>), 120.3, 123.2, 125.9, 126.9, 128.4, 128.7, 132.5, 139.5, 151.2, 152.0 (NH<sub>2</sub>CHC<sub>6</sub>H<sub>5</sub>CHNTfC<sub>6</sub>H<sub>4</sub>). Elemental analysis calcd(%) for C<sub>25</sub>H<sub>28</sub>F<sub>3</sub>IrN<sub>2</sub>O<sub>2</sub>S: C, 44.83; H, 4.21; N, 4.18; found: C, 44.45; H, 4.35; N, 4.20.

#### *Cp\*Ir[ $\kappa^3$ (*N,N'*,*C*)-(S,S)-NTfCHPhCHNH<sub>2</sub>C<sub>6</sub>H<sub>4</sub>)] (**3**)*

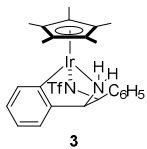

$^1\text{H}$  NMR (CD<sub>2</sub>Cl<sub>2</sub>, r.t.):  $\delta$  1.83 (s, 15H; C<sub>5</sub>(CH<sub>3</sub>)<sub>5</sub>), 3.00 (br, 1H; NTfCHC<sub>6</sub>H<sub>5</sub>CHNH<sub>2</sub>C<sub>6</sub>H<sub>4</sub>), 3.26 (br, 1H; NTfCHC<sub>6</sub>H<sub>5</sub>CHNH<sub>2</sub>C<sub>6</sub>H<sub>4</sub>), 4.14 (s, 1H; NTfCHC<sub>6</sub>H<sub>5</sub>CHNH<sub>2</sub>C<sub>6</sub>H<sub>4</sub>), 4.57 (s, 1H; NTfCHC<sub>6</sub>H<sub>5</sub>CHNH<sub>2</sub>C<sub>6</sub>H<sub>4</sub>), 6.99-7.03 (m, 2H; aryl), 7.32-7.35 (m, 2H; aryl), 7.42-7.46 (m, 2H; aryl), 7.51-7.53 (m, 2H; aryl), 7.80-7.82 (m, 1H; aryl);  $^{19}\text{F}$  NMR (CD<sub>2</sub>Cl<sub>2</sub>, r.t.):  $\delta$  -76.0 (s, CF<sub>3</sub>);  $^{13}\text{C}\{^1\text{H}\}$  NMR (CD<sub>2</sub>Cl<sub>2</sub>, r.t.):  $\delta$  9.32 (C<sub>5</sub>(CH<sub>3</sub>)<sub>5</sub>),

62.7 (NTfCHC<sub>6</sub>H<sub>5</sub>CHNH<sub>2</sub>C<sub>6</sub>H<sub>4</sub>), 71.5 (NTfCHC<sub>6</sub>H<sub>5</sub>CHNH<sub>2</sub>C<sub>6</sub>H<sub>4</sub>), 87.4 (C<sub>5</sub>(CH<sub>3</sub>)<sub>5</sub>), 119.8 (q, <sup>1</sup>J<sub>CF</sub> = 332.7 Hz; CF<sub>3</sub>), 121.5, 123.0, 126.0, 126.8, 127.7, 129.1, 133.6, 142.0, 148.0, 150.2 (NTfCHC<sub>6</sub>H<sub>5</sub>CHNH<sub>2</sub>C<sub>6</sub>H<sub>4</sub>). Elemental analysis calcd(%) for C<sub>25</sub>H<sub>28</sub>F<sub>3</sub>IrN<sub>2</sub>O<sub>2</sub>S: C, 44.83; H, 4.21; N, 4.18; found: C, 45.01; H, 4.48; N, 4.29.

***Cp\*IrCl[κ<sup>2</sup>(N,N')-NTfCH<sub>2</sub>CH<sub>2</sub>NH<sub>2</sub>]***

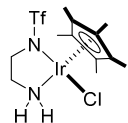

<sup>1</sup>H NMR (CD<sub>2</sub>Cl<sub>2</sub>, r.t.): δ 1.64 (s, 15H; C<sub>5</sub>(CH<sub>3</sub>)<sub>5</sub>), 2.96 (br, 4H; NTfCH<sub>2</sub>CH<sub>2</sub>NH<sub>2</sub>), 3.80 (br, 1H; NTfCH<sub>2</sub>CH<sub>2</sub>NH<sub>2</sub>), 3.99 (br, 1H; NTfCH<sub>2</sub>CH<sub>2</sub>NH<sub>2</sub>); <sup>19</sup>F NMR (CD<sub>2</sub>Cl<sub>2</sub>, r.t.): δ -74.2 (s, CF<sub>3</sub>); <sup>13</sup>C{<sup>1</sup>H} NMR (DMSO-*d*<sub>6</sub>): δ 9.19 (C<sub>5</sub>(CH<sub>3</sub>)<sub>5</sub>), 47.7 (NTfCH<sub>2</sub>CH<sub>2</sub>NH<sub>2</sub>), 51.8 (NTfCH<sub>2</sub>CH<sub>2</sub>NH<sub>2</sub>), 85.3 (C<sub>5</sub>(CH<sub>3</sub>)<sub>5</sub>), 121.1 (q, <sup>1</sup>J<sub>CF</sub> = 329.7 Hz; CF<sub>3</sub>). Elemental analysis calcd(%) for C<sub>14</sub>H<sub>23</sub>Cl<sub>3</sub>F<sub>3</sub>IrN<sub>2</sub>O<sub>2</sub>S: C, 26.32; H, 3.63; N, 4.38; found: C, 26.66; H, 3.43; N, 4.41.

***Cp\*IrH[κ<sup>2</sup>(N,N')-NTfCH<sub>2</sub>CH<sub>2</sub>NH<sub>2</sub>]***

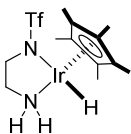

<sup>1</sup>H NMR (THF-*d*<sub>8</sub>, r.t.): δ -11.3 (s, 1H; IrH), 1.70 (s, 15H; C<sub>5</sub>(CH<sub>3</sub>)<sub>5</sub>), 2.42 (m, 2H; NTfCH<sub>2</sub>CH<sub>2</sub>NH<sub>2</sub>), 2.82 (br, 2H; NTfCH<sub>2</sub>CH<sub>2</sub>NH<sub>2</sub>), 4.43 (br, 1H; NTfCH<sub>2</sub>CH<sub>2</sub>NH<sub>2</sub>), 5.05 (br, 1H; NTfCH<sub>2</sub>CH<sub>2</sub>NH<sub>2</sub>); <sup>19</sup>F NMR (THF-*d*<sub>8</sub>, r.t.): δ -72.6 (s, CF<sub>3</sub>); <sup>13</sup>C{<sup>1</sup>H} NMR (THF-*d*<sub>8</sub>, r.t.): δ = 9.28 (C<sub>5</sub>(CH<sub>3</sub>)<sub>5</sub>), 49.1 (NTfCH<sub>2</sub>CH<sub>2</sub>NH<sub>2</sub>), 54.0 (NTfCH<sub>2</sub>CH<sub>2</sub>NH<sub>2</sub>), 85.7 (C<sub>5</sub>(CH<sub>3</sub>)<sub>5</sub>), 122.6 (q, <sup>1</sup>J<sub>CF</sub> = 331.6 Hz; CF<sub>3</sub>). Elemental analysis calcd(%) for C<sub>13</sub>H<sub>22</sub>F<sub>3</sub>IrN<sub>2</sub>O<sub>2</sub>S: C, 30.05; H, 4.27; N, 5.39; found: C, 30.28; H, 4.48; N, 5.46.

### **X-ray structure determination**

All measurements were made on a Rigaku Saturn CCD area detector equipped with graphite-monochromated Mo- $K\alpha$  radiation ( $\lambda = 0.71070 \text{ \AA}$ ) under nitrogen stream at 123 K. Indexing was performed from eighteen images. The crystal-to-detector distance was 45.05 mm. The data were collected to a maximum  $2\theta$  value of  $55.0^\circ$ . A total of 720 oscillation images were collected. A sweep of data was carried out using  $\omega$  scans from  $-110.0$  to  $70.0^\circ$  in  $0.5^\circ$  steps, at  $\chi = 45.0^\circ$  and  $\phi = 0.0^\circ$ . A second sweep was performed using  $\omega$  scans from  $-110.0$  to  $70.0^\circ$  in  $0.5^\circ$  steps, at  $\chi = 45.0^\circ$  and  $\phi = 90.0^\circ$ . Intensity data were collected for Lorentz-polarization effects as well as absorption. Structure solution and refinements were performed with the CrystalStructure program package. The heavy atom positions were determined by Direct methods (SIR2002), and the remaining non-hydrogen atoms were found by subsequent Fourier techniques. An empirical absorption correction based on equivalent reflections was applied to all data. All non-hydrogen atoms other than solvent molecules were refined anisotropically by full-matrix least-square techniques based on  $F^2$ . The low-temperature data collection enabled hydrogens attached to the primary amine in **2**, **3**, **4**, and **5b** to be located from the Fourier difference map and refined isotropically. All other hydrogens either were not refined or were constrained to ride on their parent atom. Relevant crystallographic data are compiled in Tables S3 and S4.

**Table S1.** Comparison of selected bond lengths and angles of **2** and **3**.

| Complex              | Ir1-N1     | Ir-N2      | Ir-Cp*(av.) | ∠N1-Ir1-N2  |
|----------------------|------------|------------|-------------|-------------|
| <b>2<sup>a</sup></b> | 2.1595 Å   | 2.139 Å    | 2.1886 Å    | 75.95°      |
| <b>3</b>             | 2.120(4) Å | 2.166(4) Å | 2.1926 Å    | 76.20(15) ° |

a) Mean value.

**Table S2.** Comparison of selected bond lengths and angles of **5b** and **1b<sup>1</sup>**.

| Complex   | Ir1-N1     | Ir-N2      | Ir-Cp*(av.) | ∠N1-Ir1-N2  |
|-----------|------------|------------|-------------|-------------|
| <b>5b</b> | 2.143(4) Å | 2.136(5) Å | 2.1908 Å    | 79.63(17)°  |
| <b>1b</b> | 2.126(2) Å | 2.149(3) Å | 2.195 Å     | 76.58(10) ° |

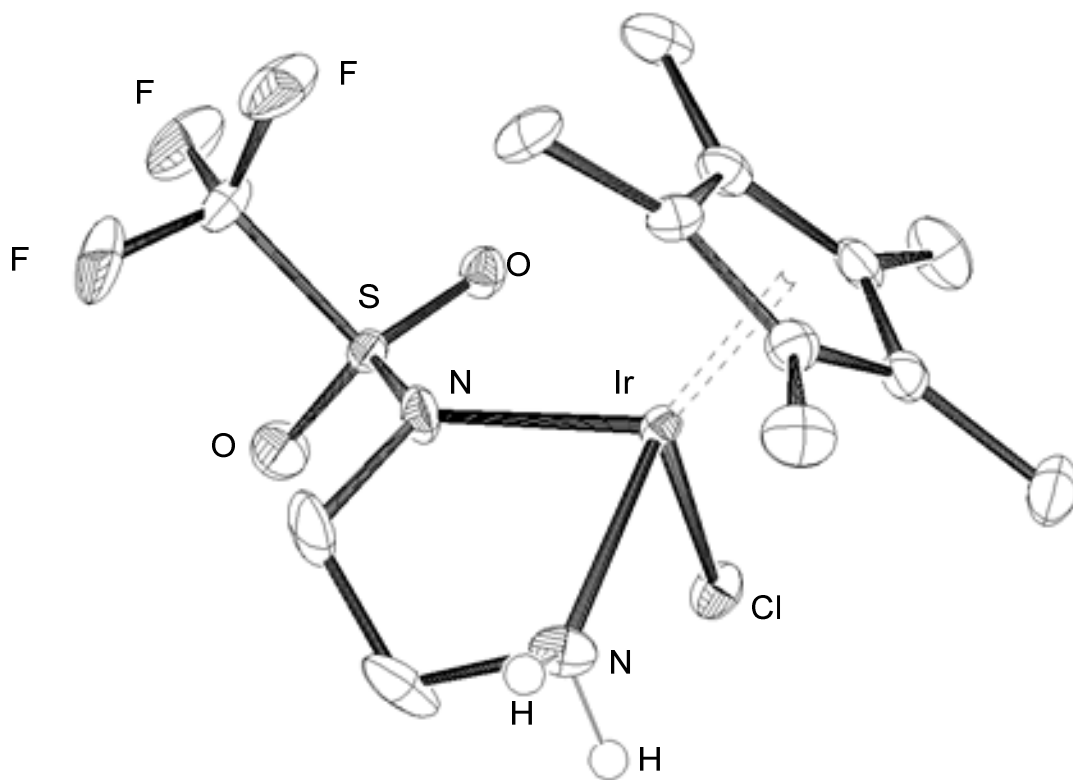

**Figure S3.** ORTEP drawing of a chloroiridium complex **4** derived from TfEN.



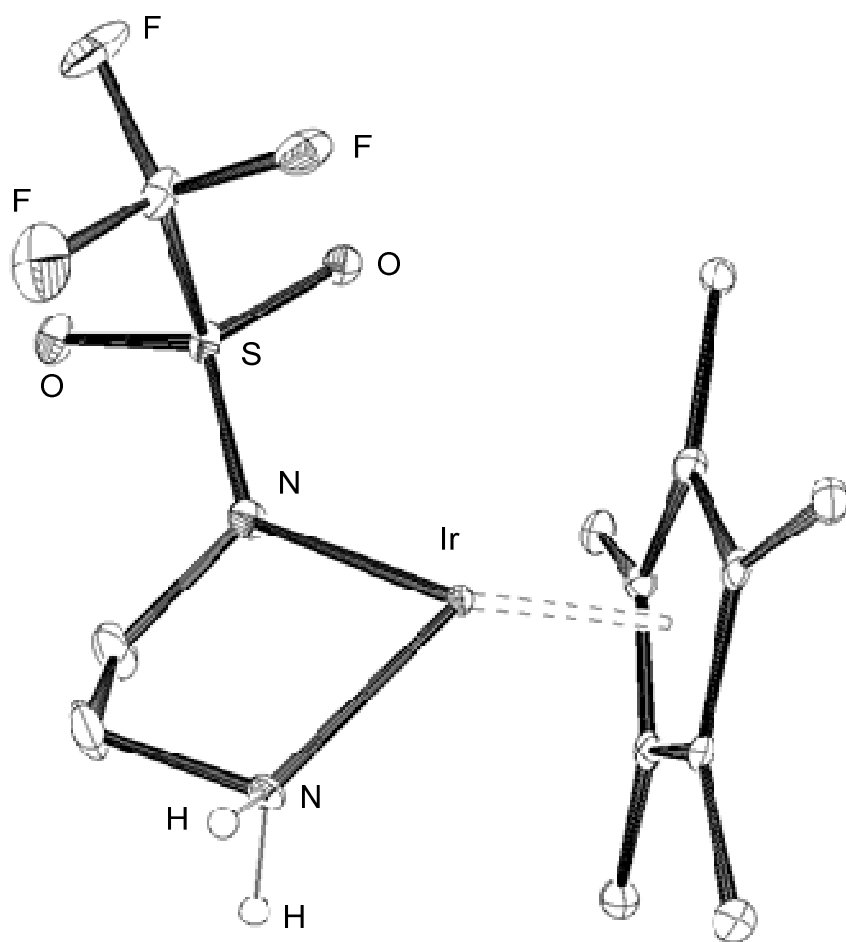

**Figure S4.** ORTEP drawing of a hydrido-iridium complex **5b** derived from TfEN.

**Table S3.** Crystallographic data for **2** and **3**

|                                            | <b>2</b>                                                                         | <b>3</b>                                                                                                  |
|--------------------------------------------|----------------------------------------------------------------------------------|-----------------------------------------------------------------------------------------------------------|
| Empirical Formula                          | C <sub>25</sub> H <sub>28</sub> F <sub>3</sub> IrN <sub>2</sub> O <sub>2</sub> S | C <sub>25</sub> H <sub>28</sub> F <sub>3</sub> IrN <sub>2</sub> O <sub>2</sub> S                          |
| Formula Weight                             | 669.78                                                                           | 669.78                                                                                                    |
| Crystal Color, Habit                       | yellow, prism                                                                    | yellow, prism                                                                                             |
| Crystal System                             | monoclinic                                                                       | orthohombic                                                                                               |
| Space Group                                | <i>C</i> 2 (#5)                                                                  | <i>P</i> 2 <sub>1</sub> 2 <sub>1</sub> 2 <sub>1</sub> (#19)                                               |
| Lattice Parameters                         | <i>a</i> = 20.77760 Å<br><i>b</i> = 14.35170 Å<br><i>c</i> = 18.81300 Å          | <i>a</i> = 11.1945(10) Å<br><i>b</i> = 12.8348(11) Å<br><i>c</i> = 17.138(2) Å<br><i>β</i> = 114.794(2) ° |
|                                            | <i>V</i> = 5234.74710 Å <sup>3</sup>                                             | <i>V</i> = 2462.4(4) Å <sup>3</sup>                                                                       |
| Z value                                    | 8                                                                                | 4                                                                                                         |
| <i>D</i> <sub>calc</sub>                   | 1.700 g/cm <sup>3</sup>                                                          | 1.807 g/cm <sup>3</sup>                                                                                   |
| <i>F</i> <sub>000</sub>                    | 2624.00                                                                          | 1312.00                                                                                                   |
| μ(MoKα)                                    | 52.401 cm <sup>-1</sup>                                                          | 55.699 cm <sup>-1</sup>                                                                                   |
| Exposure Rate                              | 10.0 sec./°                                                                      | 10.0 sec./°                                                                                               |
| No. of Reflections Measured                | 21609                                                                            | 20326                                                                                                     |
| No. of unique reflections                  | 9804                                                                             | 5646                                                                                                      |
| No. Variables                              | 670                                                                              | 336                                                                                                       |
| <i>R</i> 1 ( <i>I</i> > 2.00σ( <i>I</i> )) | 0.0359                                                                           | 0.0253                                                                                                    |
| w <i>R</i> 2 (All reflections)             | 0.0935                                                                           | 0.0647                                                                                                    |
| GOF on <i>F</i> <sup>2</sup>               | 1.000                                                                            | 1.000                                                                                                     |

$$R1 = \Sigma ||F_o| - |F_c|| / \Sigma |F_o|, wR2 = [ \Sigma ( w (F_o^2 - F_c^2)^2 ) / \Sigma w(F_o^2)^2 ]^{1/2}$$

**Table S4.** Crystallographic data for **4·CH<sub>2</sub>Cl<sub>2</sub>** and **5b**

|                                            | <b>4·CH<sub>2</sub>Cl<sub>2</sub></b>                                                                                                        | <b>5b</b>                                                                                |
|--------------------------------------------|----------------------------------------------------------------------------------------------------------------------------------------------|------------------------------------------------------------------------------------------|
| Empirical Formula                          | C <sub>14</sub> H <sub>23</sub> Cl <sub>3</sub> F <sub>3</sub> IrN <sub>2</sub> O <sub>2</sub> S                                             | C <sub>13</sub> H <sub>22</sub> F <sub>3</sub> IrN <sub>2</sub> O <sub>2</sub> S         |
| Formula Weight                             | 638.98                                                                                                                                       | 519.60                                                                                   |
| Crystal Color, Habit                       | yellow, prism                                                                                                                                | orange, prism                                                                            |
| Crystal System                             | monoclinic                                                                                                                                   | tetragonal                                                                               |
| Space Group                                | <i>P</i> 2 <sub>1</sub> / <i>c</i> (#14)                                                                                                     | <i>I</i> 4 <sub>1</sub> <i>cd</i> (#110)                                                 |
| Lattice Parameters                         | <i>a</i> = 11.168(3) Å<br><i>b</i> = 11.884(3) Å<br><i>c</i> = 16.488(4) Å<br><i>β</i> = 104.162(3) °<br><i>V</i> = 2121.7(9) Å <sup>3</sup> | <i>a</i> = 16.724(2) Å<br><i>c</i> = 23.136(3) Å<br><i>V</i> = 6470.7(12) Å <sup>3</sup> |
| Z value                                    | 4                                                                                                                                            | 16                                                                                       |
| <i>D</i> <sub>calc</sub>                   | 2.000 g/cm <sup>3</sup>                                                                                                                      | 2.133 g/cm <sup>3</sup>                                                                  |
| <i>F</i> <sub>000</sub>                    | 1232.00                                                                                                                                      | 4000.00                                                                                  |
| μ(MoKα)                                    | 68.226 cm <sup>-1</sup>                                                                                                                      | 84.433 cm <sup>-1</sup>                                                                  |
| Exposure Rate                              | 6.0 sec./°                                                                                                                                   | 2.0 sec./°                                                                               |
| No. of Reflections Measured                | 17038                                                                                                                                        | 25200                                                                                    |
| No. of unique reflections                  | 4866                                                                                                                                         | 3673                                                                                     |
| No. Variables                              | 258                                                                                                                                          | 221                                                                                      |
| <i>R</i> 1 ( <i>I</i> > 2.00σ( <i>I</i> )) | 0.0381                                                                                                                                       | 0.0234                                                                                   |
| w <i>R</i> 2 (All reflections)             | 0.1014                                                                                                                                       | 0.0574                                                                                   |
| GOF on <i>F</i> <sup>2</sup>               | 1.000                                                                                                                                        | 1.000                                                                                    |

$$R1 = \Sigma ||F_o| - |F_c|| / \Sigma |F_o|, wR2 = [ \Sigma ( w (F_o^2 - F_c^2)^2 ) / \Sigma w(F_o^2)^2 ]^{1/2}$$

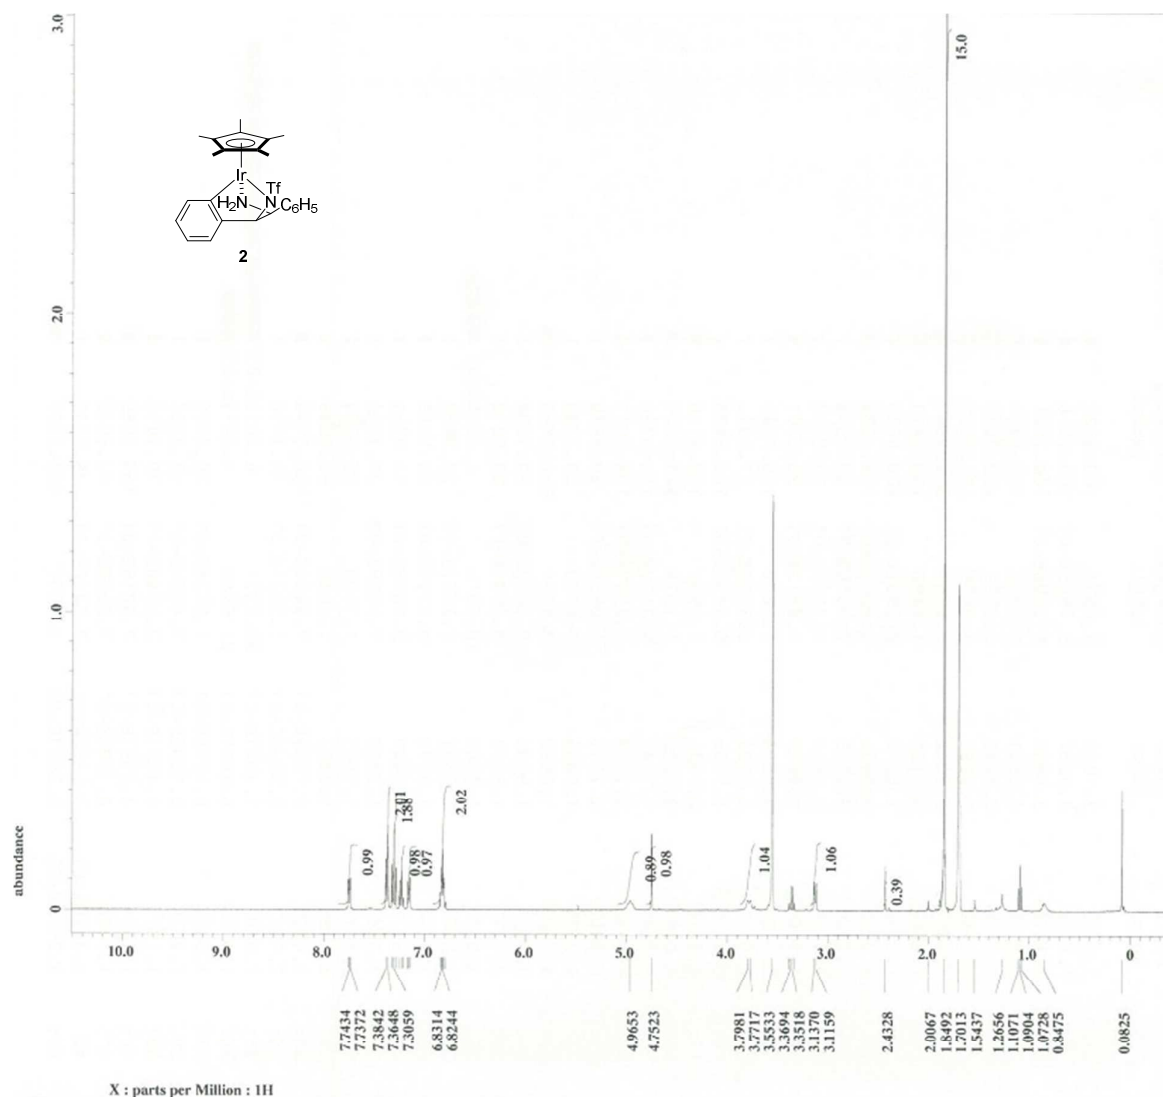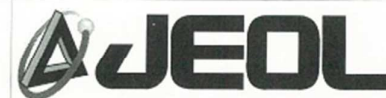

----- PROCESSING PARAMETERS -----

dc\_balance : 0 : FALSE  
 secp : 0.2[Hz] : 0.0[s]  
 trapezoid3 : 0[%] : 80[%] : 100[%]  
 zerofill : 1  
 fft : 1 : TRUE : TRUE  
 machinephase  
 ppm  
 phase : 0 : 0 : 50[%]

Derived from: 1847-TfIrC-Tf-1H-1.jdf

Filename = 1847-TfIrC-Tf-1H-5.jd  
 Author = delta  
 Experiment = single\_pulse.ex2  
 Sample\_id = 1  
 Solvent = TETRAHYDROFURAN-  
 Creation\_time = 26-JAN-2017 11:06:03  
 Revision\_time = 28-JAN-2017 18:38:32  
 Current\_time = 28-JAN-2017 18:38:57

Comment = single\_pulse  
 Data\_format = 1D COMPLEX  
 Dim\_size = 52428  
 Dim\_title = 1H  
 Dim\_units = [ppm]  
 Dimensions = X  
 Site = ECX 400P  
 Spectrometer = DELTA2\_NMR

Field\_strength = 9.389766[T] (400[MHz])  
 X\_acq\_duration = 2.84164096[s]  
 X\_domain = 1H  
 X\_freq = 399.78219838[MHz]  
 X\_offset = -7[ppm]  
 X\_points = 65536  
 X\_resolution = 1  
 X\_sweep = 0.35190934[Hz]  
 X\_sweep = 23.06273063[kHz]  
 Irr\_domain = 1H  
 Irr\_freq = 399.78219838[MHz]  
 Irr\_offset = 5[ppm]  
 Tri\_domain = 1H  
 Tri\_freq = 399.78219838[MHz]  
 Tri\_offset = 5[ppm]  
 Clipped = FALSE  
 Mod\_return = 1  
 Scans = 16  
 Total\_scans = 16

X\_90\_width = 13.68[us]  
 X\_acq\_time = 2.84164096[s]  
 X\_angle = 45[deg]  
 X\_atn = 2.1[dB]  
 X\_pulse = 6.84[us]  
 Irr\_mode = Off  
 Tri\_mode = Off  
 Dante\_presat = FALSE  
 Initial\_wait = 1[s]  
 Recvr\_gain = 44  
 Relaxation\_delay = 6[s]  
 Repetition\_time = 8.84164096[s]  
 Temp\_get = 23.8[degC]

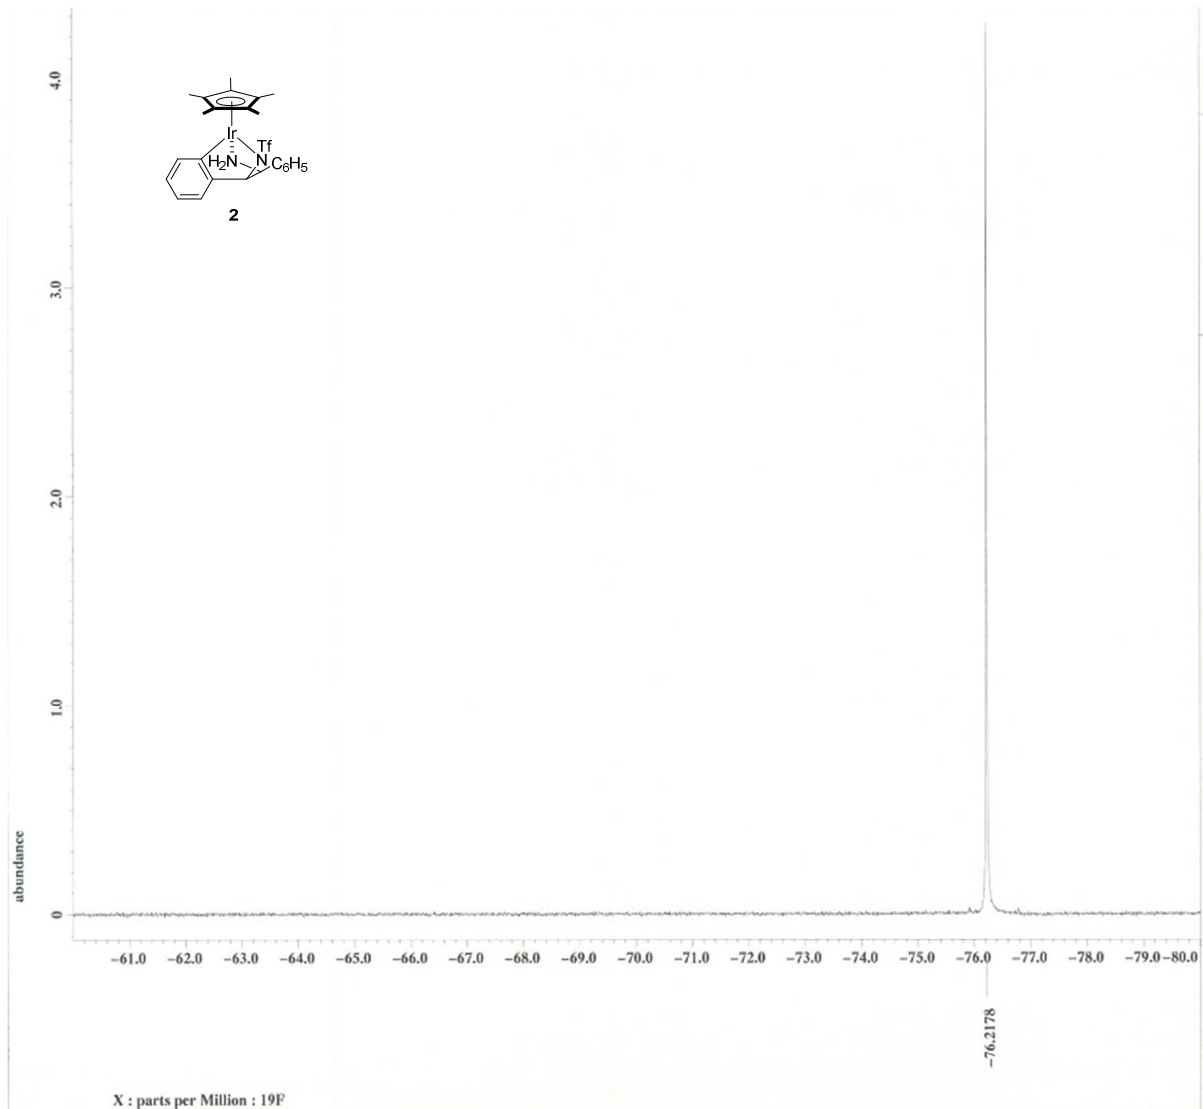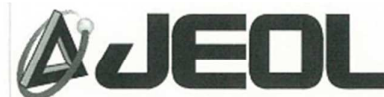

----- PROCESSING PARAMETERS -----  
 dc\_balance : 0 : FALSE  
 sexp : 0.2[Hz] : 0.0[s]  
 trapezoid3 : 0[%] : 80[%] : 100[%]  
 zerofill : 1  
 fft : 1 : TRUE : TRUE  
 machinephase  
 ppm  
 phase : 80 : 0 : 50[%]  
 phase : 0 : 0 : 50[%]  
 phase : -70 : 0 : 50[%]  
 base\_correct : None : 0 : Smooth  
 Derived from: 1847-TfIrC-Tf-19F-1.jdf

|                  |                         |
|------------------|-------------------------|
| Filename         | = 1847-TfIrC-Tf-19F-5.j |
| Author           | = delta                 |
| Experiment       | = single_pulse.ex2      |
| Sample_id        | = 1                     |
| Solvent          | = TETRAHYDROFURAN-      |
| Creation_time    | = 26-JAN-2017 11:10:26  |
| Revision_time    | = 28-JAN-2017 18:39:37  |
| Current_time     | = 28-JAN-2017 18:39:50  |
| Comment          | = single_pulse          |
| Data_format      | = 1D REAL               |
| Dim_size         | = 52428                 |
| Dim_title        | = 19F                   |
| Dim_units        | = [ppm]                 |
| Dimensions       | = X                     |
| Site             | = ECX 400P              |
| Spectrometer     | = DELTA2_NMR            |
| Field_strength   | = 9.389766[T] [400[MHz] |
| X_acq_duration   | = 0.34603008[s]         |
| X_domain         | = 19F                   |
| X_freq           | = 376.17105393[MHz]     |
| X_offset         | = 0[ppm]                |
| X_points         | = 65536                 |
| X_prescans       | = 1                     |
| X_resolution     | = 2.88992217[Hz]        |
| X_sweep          | = 189.39393939[kHz]     |
| Irr_domain       | = 19F                   |
| Irr_freq         | = 376.17105393[MHz]     |
| Irr_offset       | = 5[ppm]                |
| Tri_domain       | = 19F                   |
| Tri_freq         | = 376.17105393[MHz]     |
| Tri_offset       | = 5[ppm]                |
| Clipped          | = FALSE                 |
| Mod_return       | = 1                     |
| Scans            | = 32                    |
| Total_scans      | = 32                    |
| X_90_width       | = 16.1[us]              |
| X_acq_time       | = 0.34603008[s]         |
| X_angle          | = 45[deg]               |
| X_atn            | = 3[dB]                 |
| X_pulse          | = 8.05[us]              |
| Irr_mode         | = Off                   |
| Tri_mode         | = Off                   |
| Dante_presat     | = FALSE                 |
| Initial_wait     | = 1[s]                  |
| Recv_gain        | = 52                    |
| Relaxation_delay | = 5[s]                  |
| Repetition_time  | = 5.34603008[s]         |
| Temp_get         | = 23.7[dc]              |

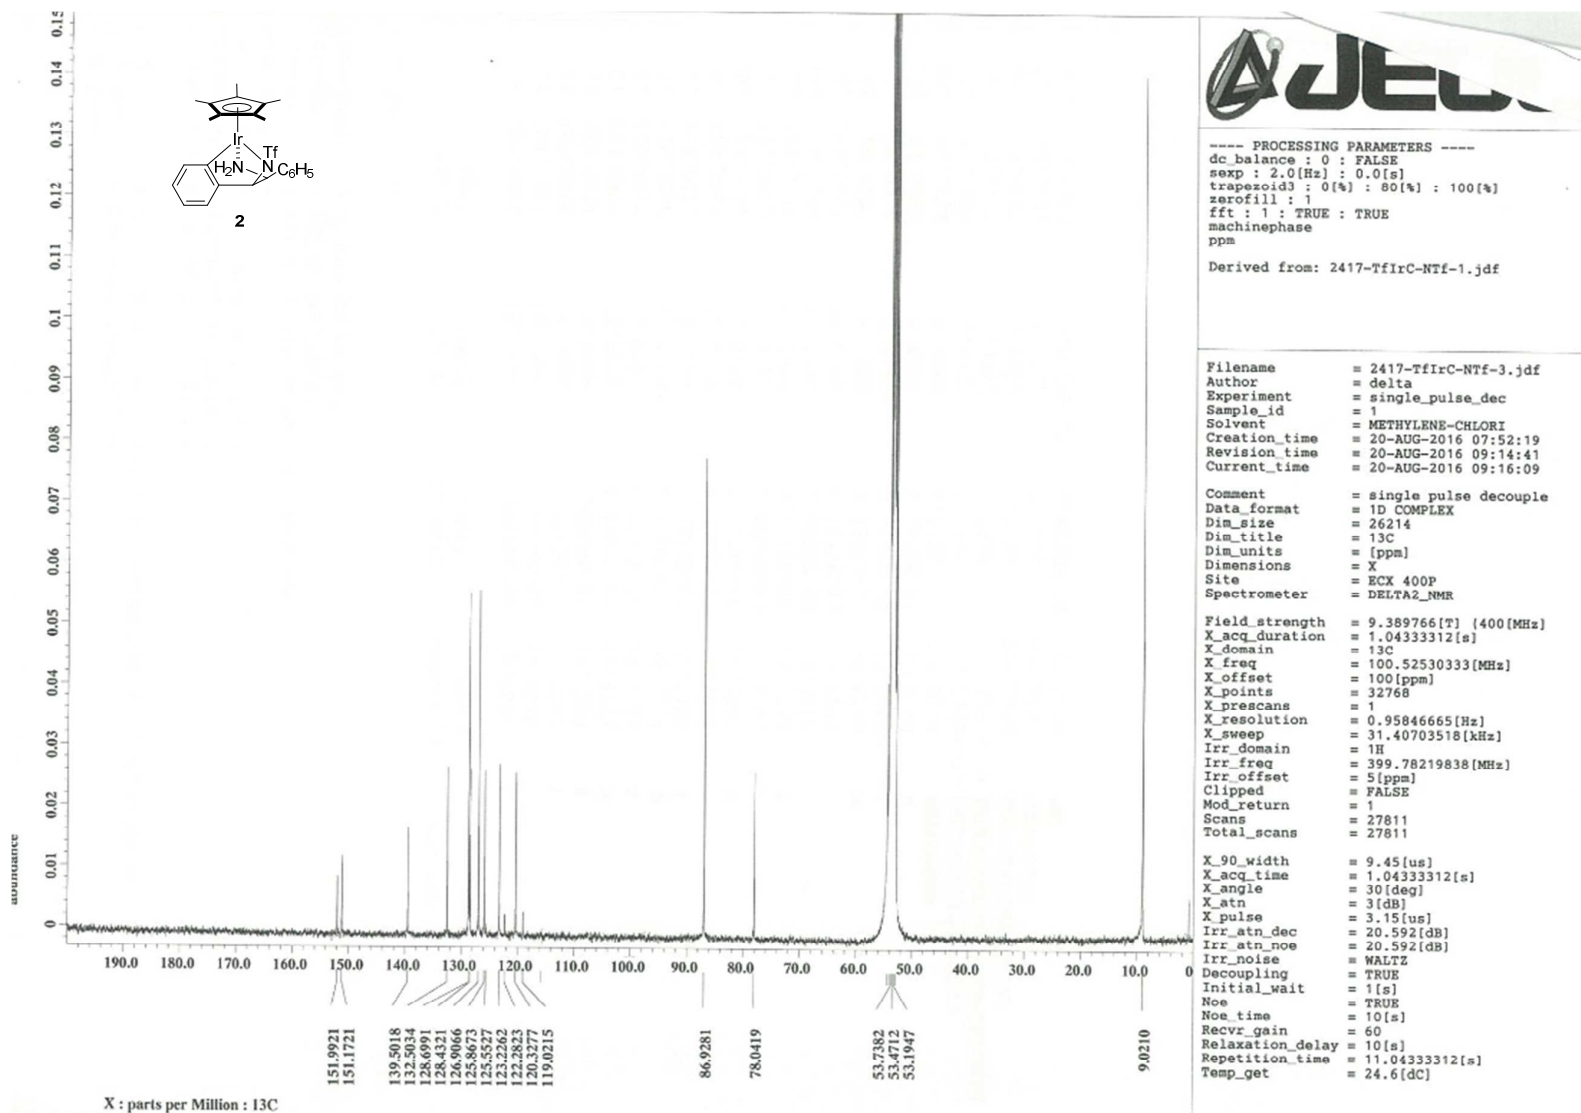

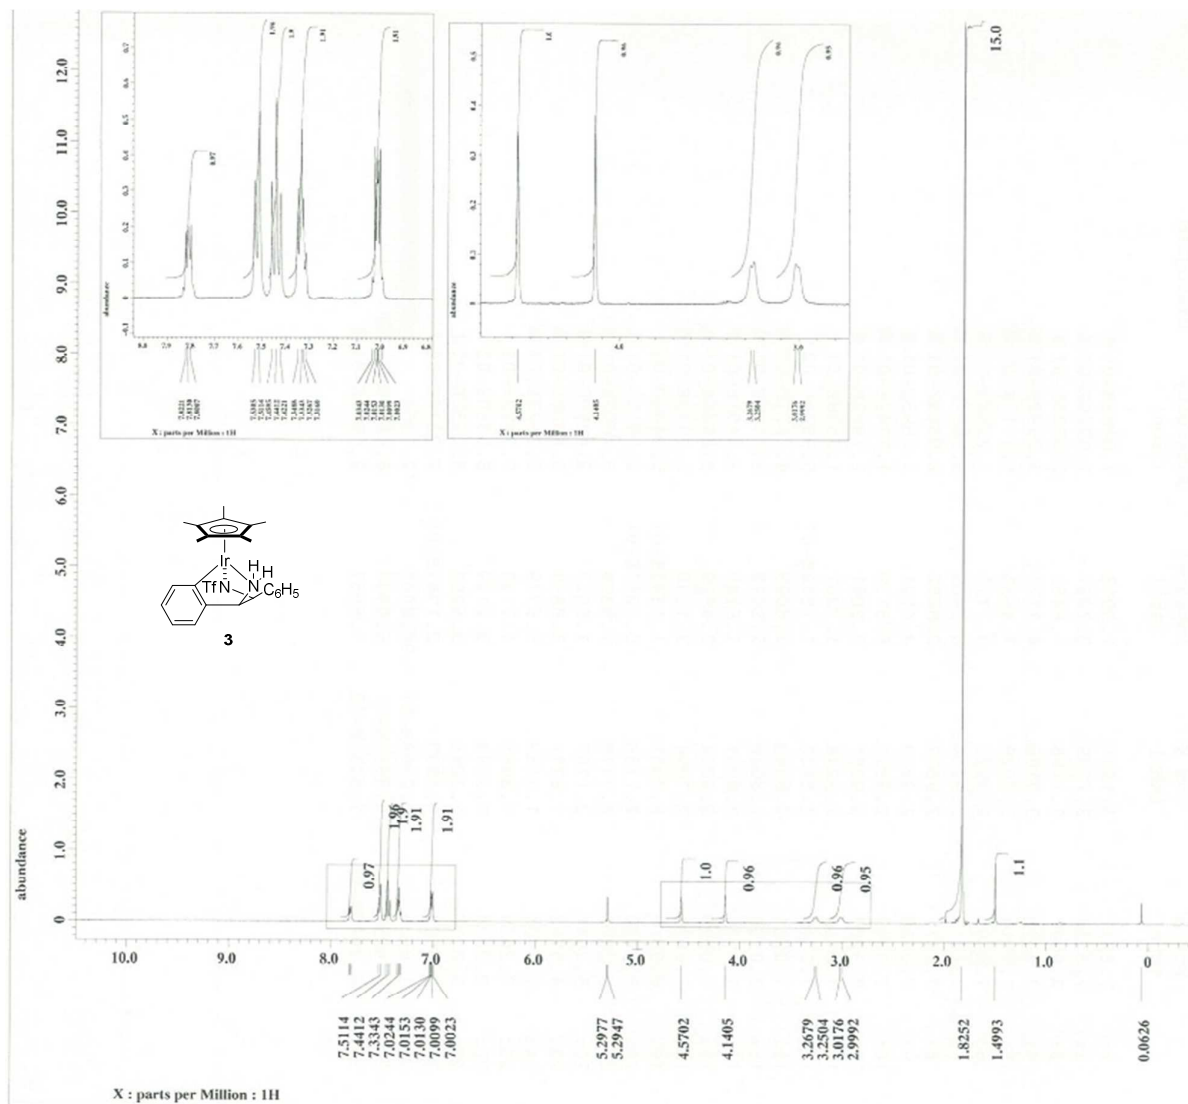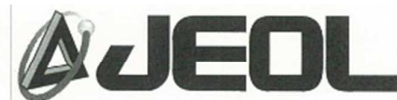

----- PROCESSING PARAMETERS -----  
 dc\_balance : 0 : FALSE  
 sexp : 0.2[Hz] : 0.0[s]  
 trapezoid3 : 0[%] : 80[%] : 100[%]  
 zerofill : 1  
 fft : 1 : TRUE : TRUE  
 machinephase  
 ppm  
 phase : 0 : 0 : 50[%]  
 Derived from: 1847-1H-1.jdf

Filename = 1847-1H-5.jdf  
 Author = delta  
 Experiment = single\_pulse.ex2  
 Sample\_id = 1  
 Solvent = METHYLENE-CHLORI  
 Creation\_time = 22-JAN-2017 14:51:11  
 Revision\_time = 22-JAN-2017 16:15:10  
 Current\_time = 22-JAN-2017 16:15:43

Comment = single\_pulse  
 Data\_format = 1D COMPLEX  
 Dim\_size = 26214  
 Dim\_title = 1H  
 Dim\_units = [ppm]  
 Dimensions = X  
 Site = ECX 400P  
 Spectrometer = DELTA2\_NMR

Field\_strength = 9.389766[T] {400[MHz]}  
 X\_acq\_duration = 3.2768[s]  
 X\_domain = 1H  
 X\_freq = 399.78219838[MHz]  
 X\_offset = 5[ppm]  
 X\_points = 32768  
 X\_prescans = 0  
 X\_resolution = 0.30517578[Hz]  
 X\_sweep = 10[kHz]  
 Irr\_domain = 1H  
 Irr\_freq = 399.78219838[MHz]  
 Irr\_offset = 5[ppm]  
 Tri\_domain = 1H  
 Tri\_freq = 399.78219838[MHz]  
 Tri\_offset = 5[ppm]  
 Clipped = FALSE  
 Mod\_return = 1  
 Scans = 5  
 Total\_scans = 5

X\_90\_width = 13.68[us]  
 X\_acq\_time = 3.2768[s]  
 X\_angle = 45[deg]  
 X\_atn = 2.1[db]  
 X\_pulse = 6.84[us]  
 Irr\_mode = Off  
 Tri\_mode = Off  
 Dante\_preat = FALSE  
 Initial\_wait = 1[s]  
 Recvr\_gain = 42  
 Relaxation\_delay = 2[s]  
 Repetition\_time = 5.2768[s]  
 Temp\_get = 35.4[dc]

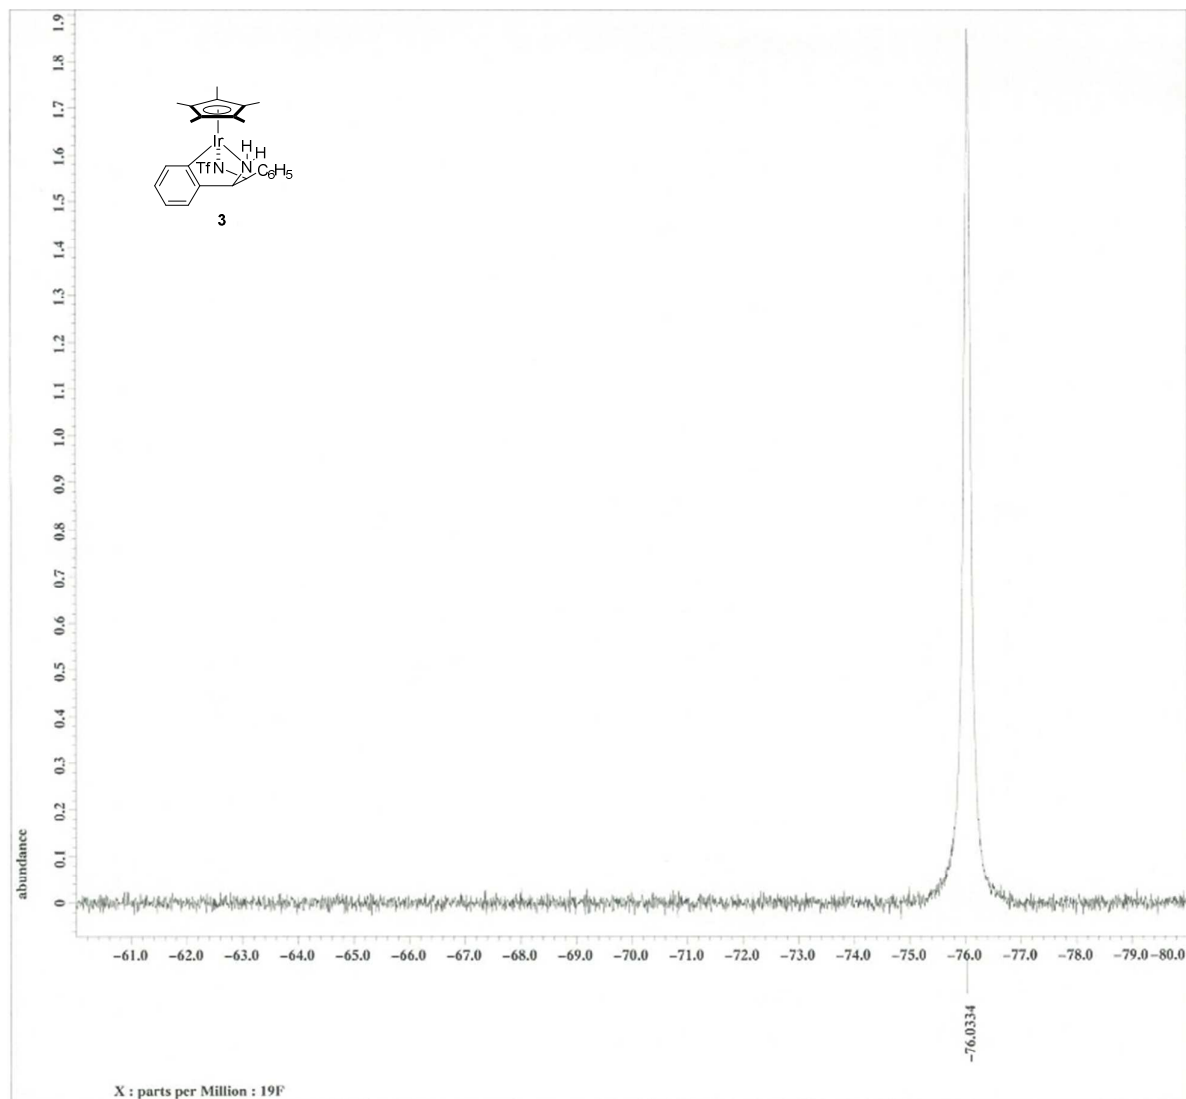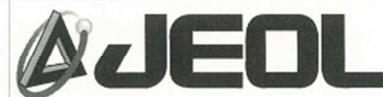

----- PROCESSING PARAMETERS -----  
 dc\_balance : 0 : FALSE  
 secp : 0.2[Hz] : 0.0[s]  
 trapezoid3 : 0[%] : 80[%] : 100[%]  
 zerofill : 1  
 fft : 1 : TRUE : TRUE  
 machinephase  
 ppm  
 phase : 80 : 0 : 50[%]  
 phase : 0 : 0 : 50[%]  
 phase : -80 : 0 : 50[%]  
 base\_correct : None : 0 : Smooth  
 Derived from: 1847-19F-1.jdf

Filename = 1847-19F-6.jdf  
 Author = delta  
 Experiment = single\_pulse.ex2  
 Sample\_id = 1  
 Solvent = METHYLENE-CHLORI  
 Creation\_time = 22-JAN-2017 14:49:24  
 Revision\_time = 22-JAN-2017 16:11:26  
 Current\_time = 22-JAN-2017 16:11:41  
 Comment = single\_pulse  
 Data\_format = 1D REAL  
 Dim\_size = 52428  
 Dim\_title = 19F  
 Dim\_units = [ppm]  
 Dimensions = X  
 Site = ECK 400P  
 Spectrometer = DELTA2\_NMR  
 Field\_strength = 9.389766[T] (400[MHz])  
 X\_acq\_duration = 0.34603008[s]  
 X\_domain = 19F  
 X\_freq = 376.17105393[MHz]  
 X\_offset = 0[ppm]  
 X\_points = 65536  
 X\_prescans = 1  
 X\_resolution = 2.88992217[Hz]  
 X\_sweep = 189.3939393[kHz]  
 Irr\_domain = 19F  
 Irr\_freq = 376.17105393[MHz]  
 Irr\_offset = 5[ppm]  
 Tri\_domain = 19F  
 Tri\_freq = 376.17105393[MHz]  
 Tri\_offset = 5[ppm]  
 Clipped = FALSE  
 Mod\_return = 1  
 Scans = 7  
 Total\_scans = 7  
 X\_90\_width = 16.1[us]  
 X\_acq\_time = 0.34603008[s]  
 X\_angle = 45[deg]  
 X\_atn = 3[dB]  
 X\_pulse = 8.05[us]  
 Irr\_mode = Off  
 Tri\_mode = Off  
 Dante\_presat = FALSE  
 Initial\_wait = 1[s]  
 Recvr\_gain = 52  
 Relaxation\_delay = 5[s]  
 Repetition\_time = 5.34603008[s]  
 Temp\_get = 36.5[degC]



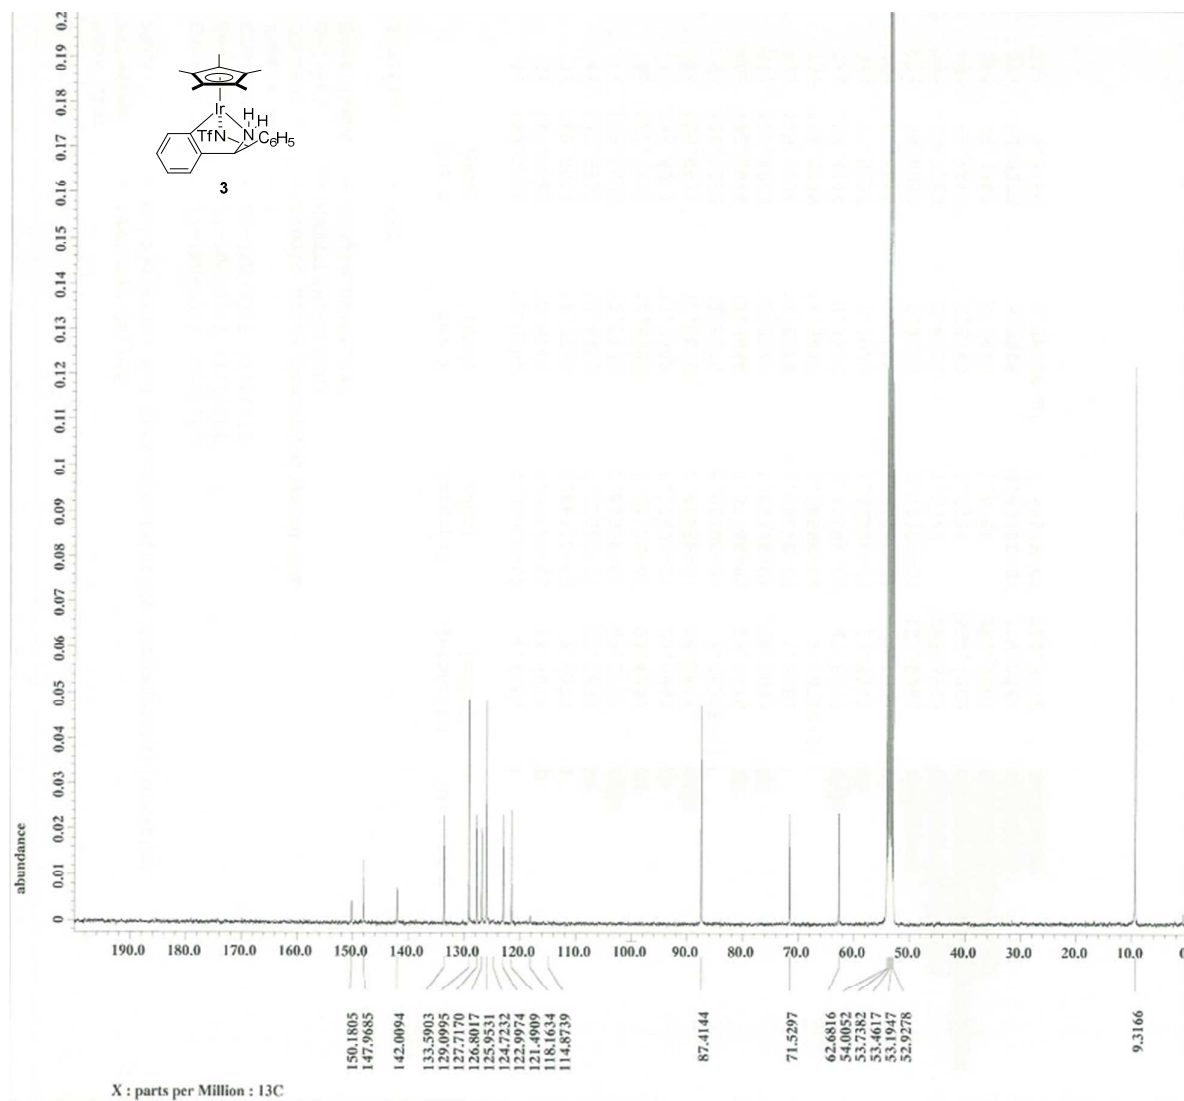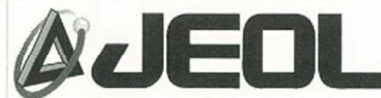

----- PROCESSING PARAMETERS -----  
 dc\_balance : 0 : FALSE  
 secp : 2.0[Hz] : 0.0[s]  
 trapezoid3 : 0[%] : 80[%] : 100[%]  
 fft : 1 : TRUE : TRUE  
 machinephase  
 ppm

Derived from: 1847-13C-1.jdf

Filename = 1847-13C-25.jdf  
 Author = delta  
 Experiment = single\_pulse\_dec  
 Sample\_id = 1  
 Solvent = METHYLENE-CHLORI  
 Creation\_time = 22-JAN-2017 14:44:19  
 Revision\_time = 27-JAN-2017 14:22:04  
 Current\_time = 27-JAN-2017 14:24:12

Comment = single pulse decouple  
 Data\_format = 1D COMPLEX  
 Dim\_size = 26214  
 Dim\_title = 13C  
 Dim\_units = [ppm]  
 Dimensions = X  
 Site = RCX 400P  
 Spectrometer = DELTA2\_NMR

Field\_strength = 9.389766[T] {400[MHz]}  
 X\_acq\_duration = 1.04333312[s]  
 X\_domain = 13C  
 X\_freq = 100.52530333[MHz]  
 X\_offset = 100[ppm]  
 X\_points = 32768  
 X\_prescans = 2  
 X\_resolution = 0.95846665[Hz]  
 X\_sweep = 31.40703518[kHz]  
 Irr\_domain = 1H  
 Irr\_freq = 399.78219838[MHz]  
 Irr\_offset = 5[ppm]  
 Clipped = FALSE  
 Mod\_return = 1  
 Scans = 16131  
 Total\_scans = 16131

X\_90\_width = 9.45[us]  
 X\_acq\_time = 1.04333312[s]  
 X\_angle = 30[deg]  
 X\_atn = 3[db]  
 X\_pulse = 3.15[us]  
 Irr\_atn\_dec = 20.592[db]  
 Irr\_atn\_noe = 20.592[db]  
 Irr\_noise = WALTZ  
 Decoupling = TRUE  
 Initial\_wait = 1[s]  
 Noe = TRUE  
 Noe\_time = 3[s]  
 Recvr\_gain = 54  
 Relaxation\_delay = 3[s]  
 Repetition\_time = 4.04333312[s]  
 Temp\_get = 42[dc]

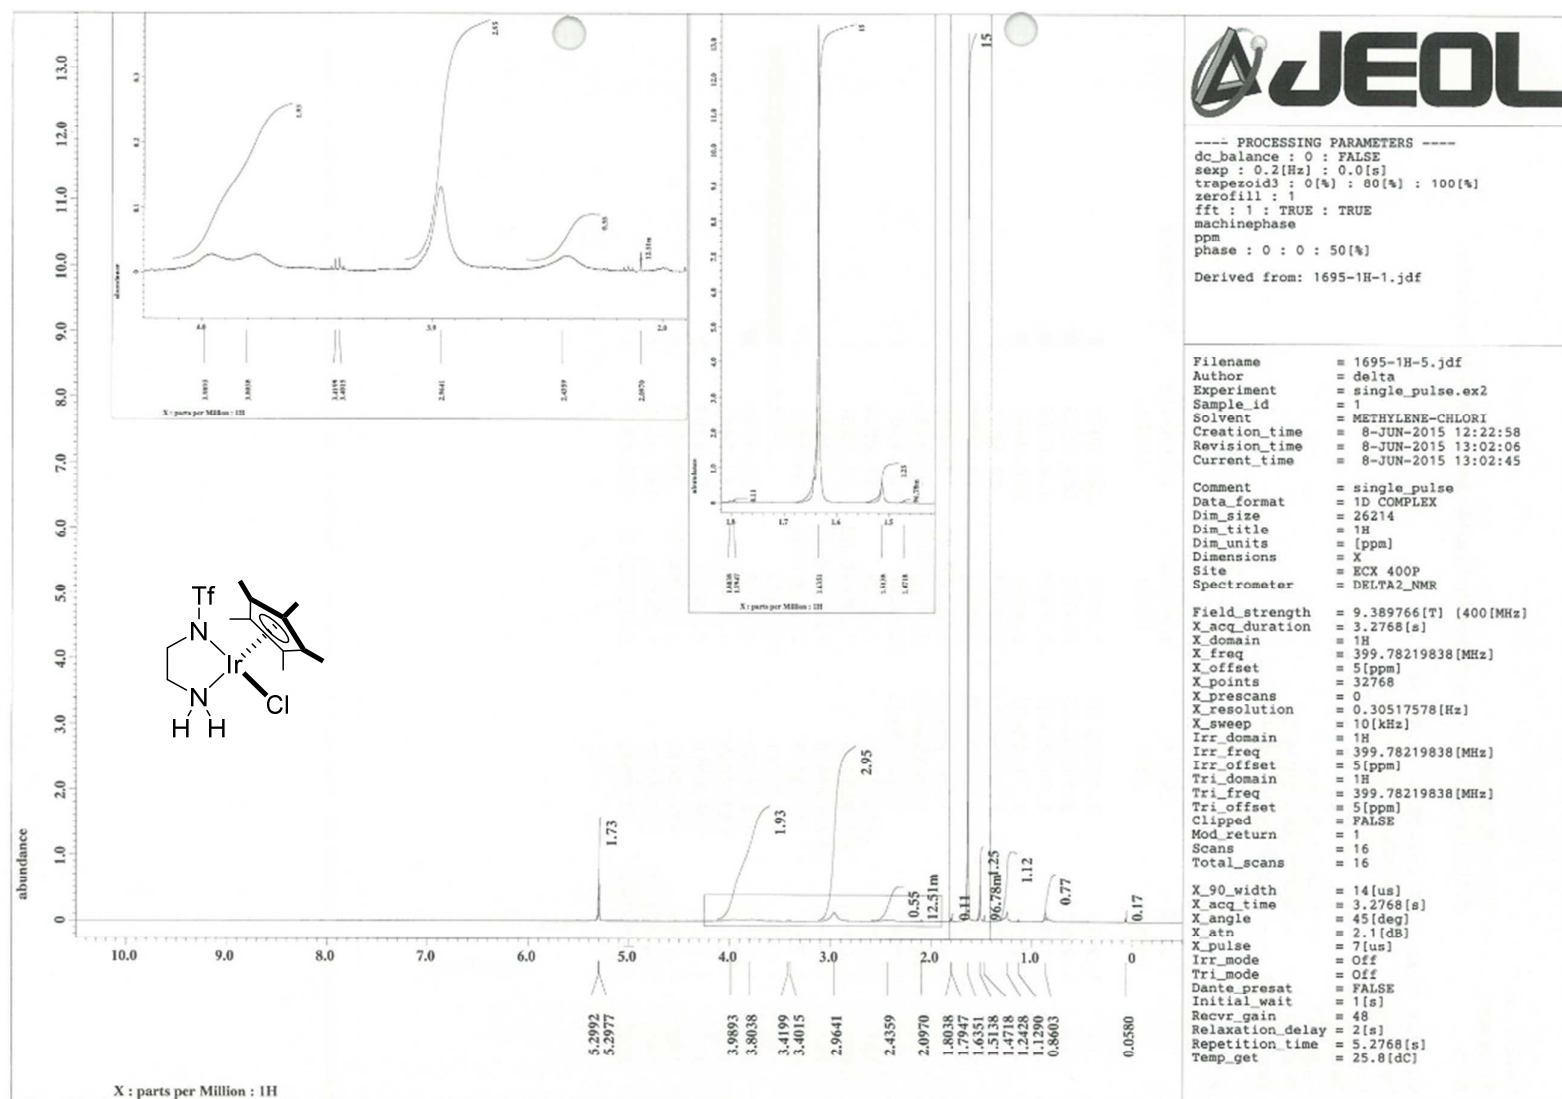

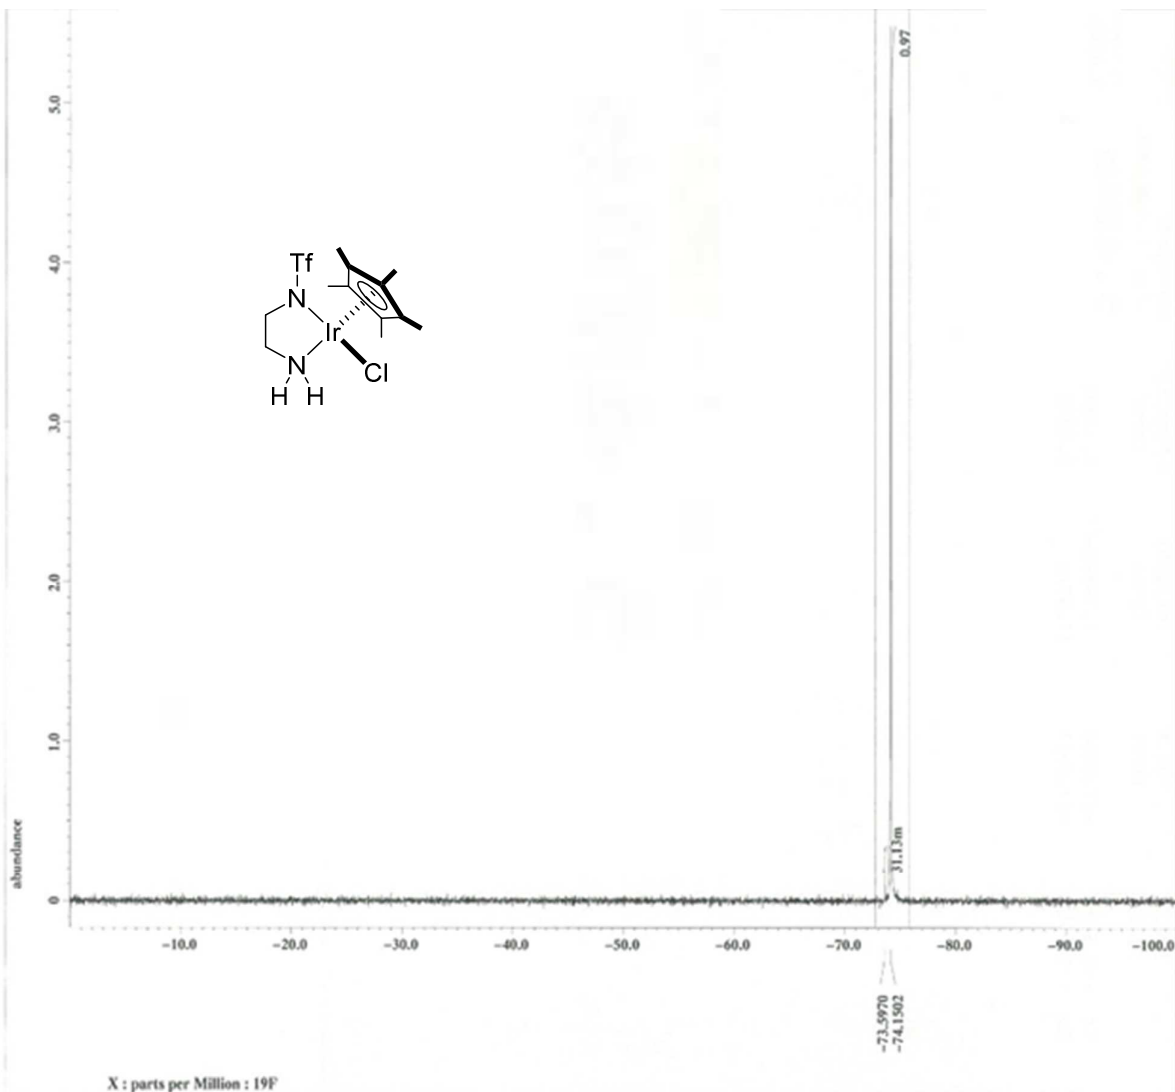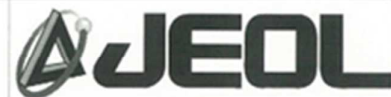

----- PROCESSING PARAMETERS -----  
 dc\_balance : 0 : FALSE  
 secp : 0.2[Hz] : 0.0[s]  
 trapezoid3 : 0[%] : 80[%] : 100[%]  
 zerofill : 1  
 fft : 1 : TRUE : TRUE  
 machinephase  
 ppm  
 reference : -77.638[ppm] : -76.5[ppm]  
 phase : 0 : 0 : 50[%]  
 phase : 0 : 0 : 50[%]  
 phase : -4 : 0 : 50[%]  
 base\_correct : None : 0 : Smooth

Filename = 1695-19F-4.jdf  
 Author = delta  
 Experiment = single\_pulse.ex2  
 Sample\_id = 1  
 Solvent = METHYLENE-CHLOR1  
 Creation\_time = 8-JUN-2015 12:20:10  
 Revision\_time = 8-JUN-2015 12:57:28  
 Current\_time = 8-JUN-2015 12:57:52

Comment = single\_pulse  
 Data\_format = 1D\_REAL  
 Dim\_size = 26214  
 Dim\_title = 19F  
 Dim\_units = [ppm]  
 Dimensions = X  
 Site = ECX 400P  
 Spectrometer = DELTA2\_NMR

Field\_strength = 9.389766[T] {400[MHz]  
 X\_acq\_duration = 0.17301504[s]  
 X\_domain = 19F  
 X\_freq = 376.17105393[MHz]  
 X\_offset = 0[ppm]  
 X\_points = 32768  
 X\_prescans = 1  
 X\_resolution = 5.77984434[Hz]  
 X\_sweep = 189.3939393[kHz]  
 Irr\_domain = 19F  
 Irr\_freq = 376.17105393[MHz]  
 Irr\_offset = 5[ppm]  
 Tri\_domain = 19F  
 Tri\_freq = 376.17105393[MHz]  
 Tri\_offset = 5[ppm]  
 Clipped = FALSE  
 Mod\_return = 1  
 Scans = 12  
 Total\_scans = 12

X\_90\_width = 16.1[us]  
 X\_acq\_time = 0.17301504[s]  
 X\_angle = 45[deg]  
 X\_atn = 3[db]  
 X\_pulse = 8.05[us]  
 Irr\_mode = Off  
 Tri\_mode = Off  
 Dante\_presat = FALSE  
 Initial\_wait = 1[s]  
 Recvr\_gain = 54  
 Relaxation\_delay = 5[s]  
 Repetition\_time = 5.17301504[s]  
 Temp\_get = 25.9[degC]



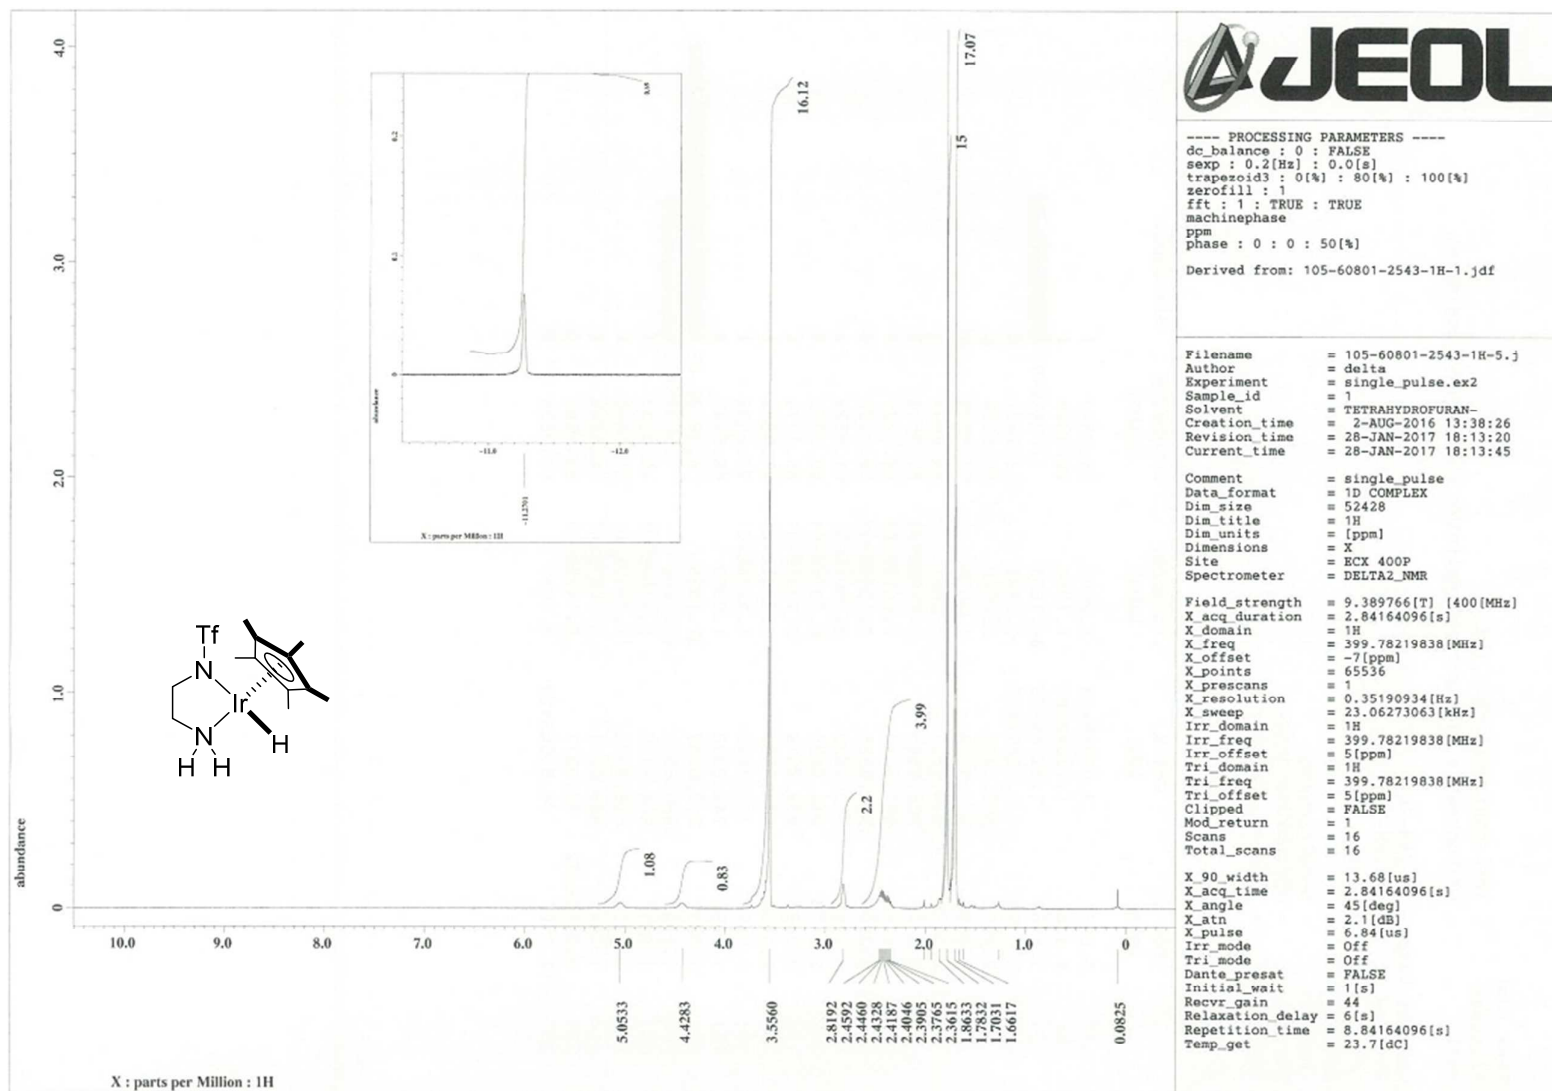

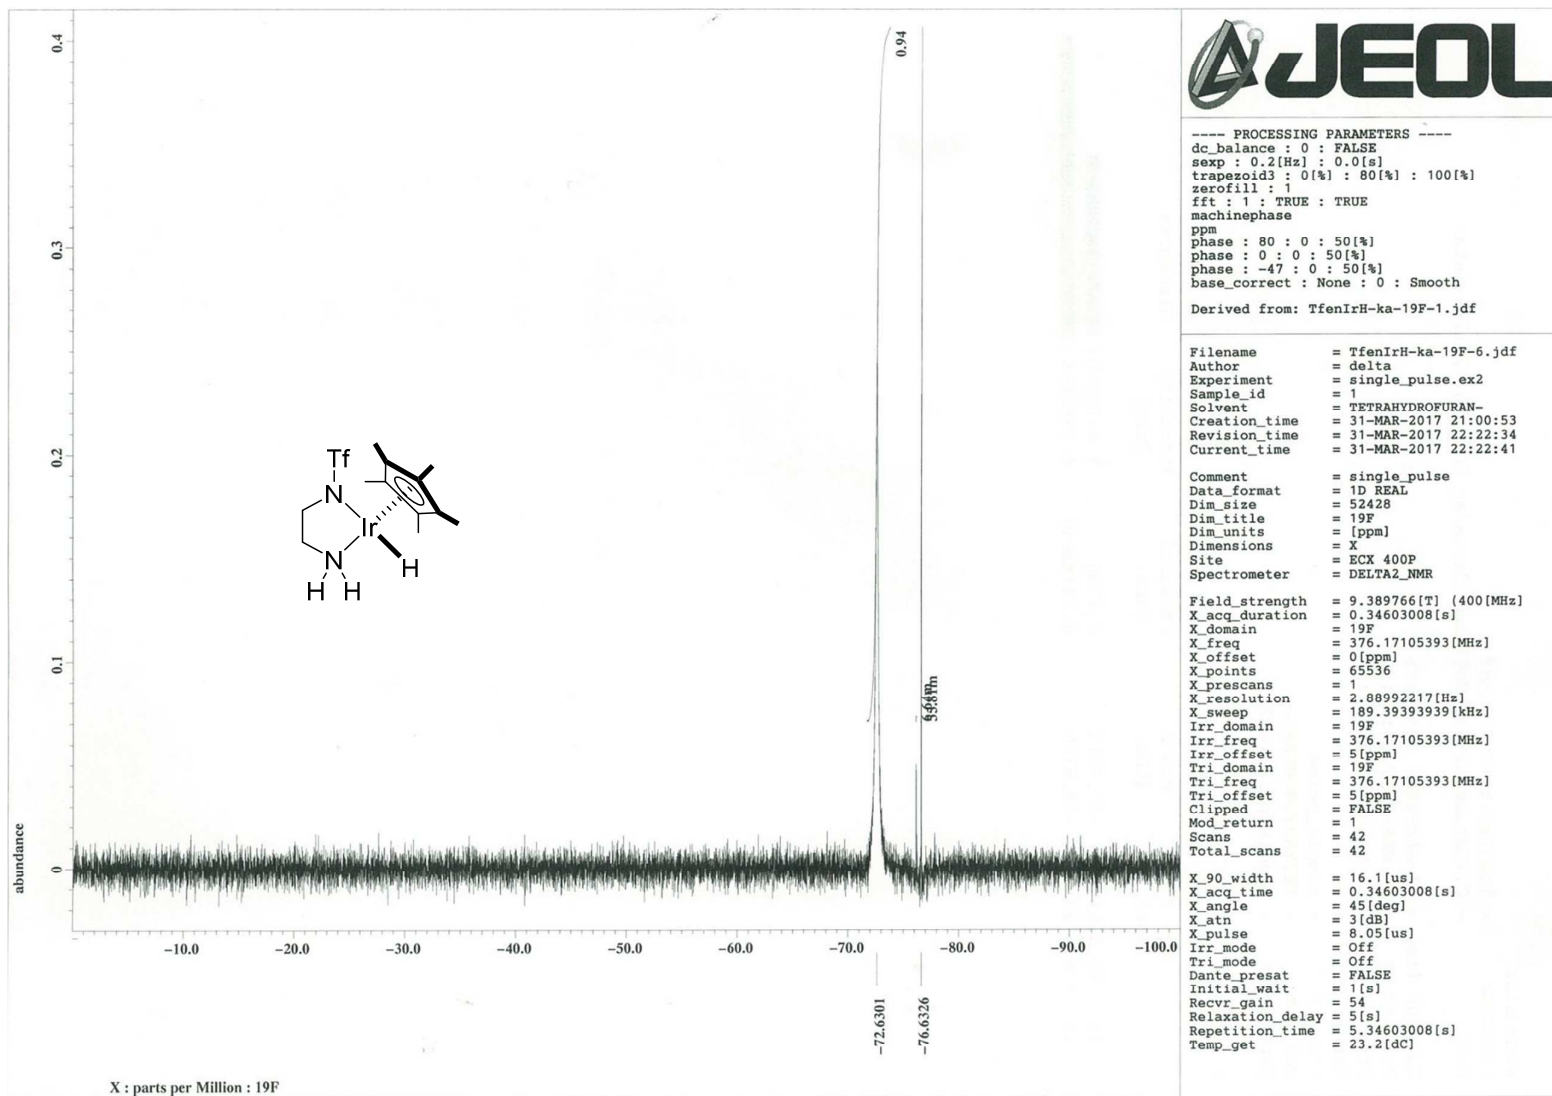

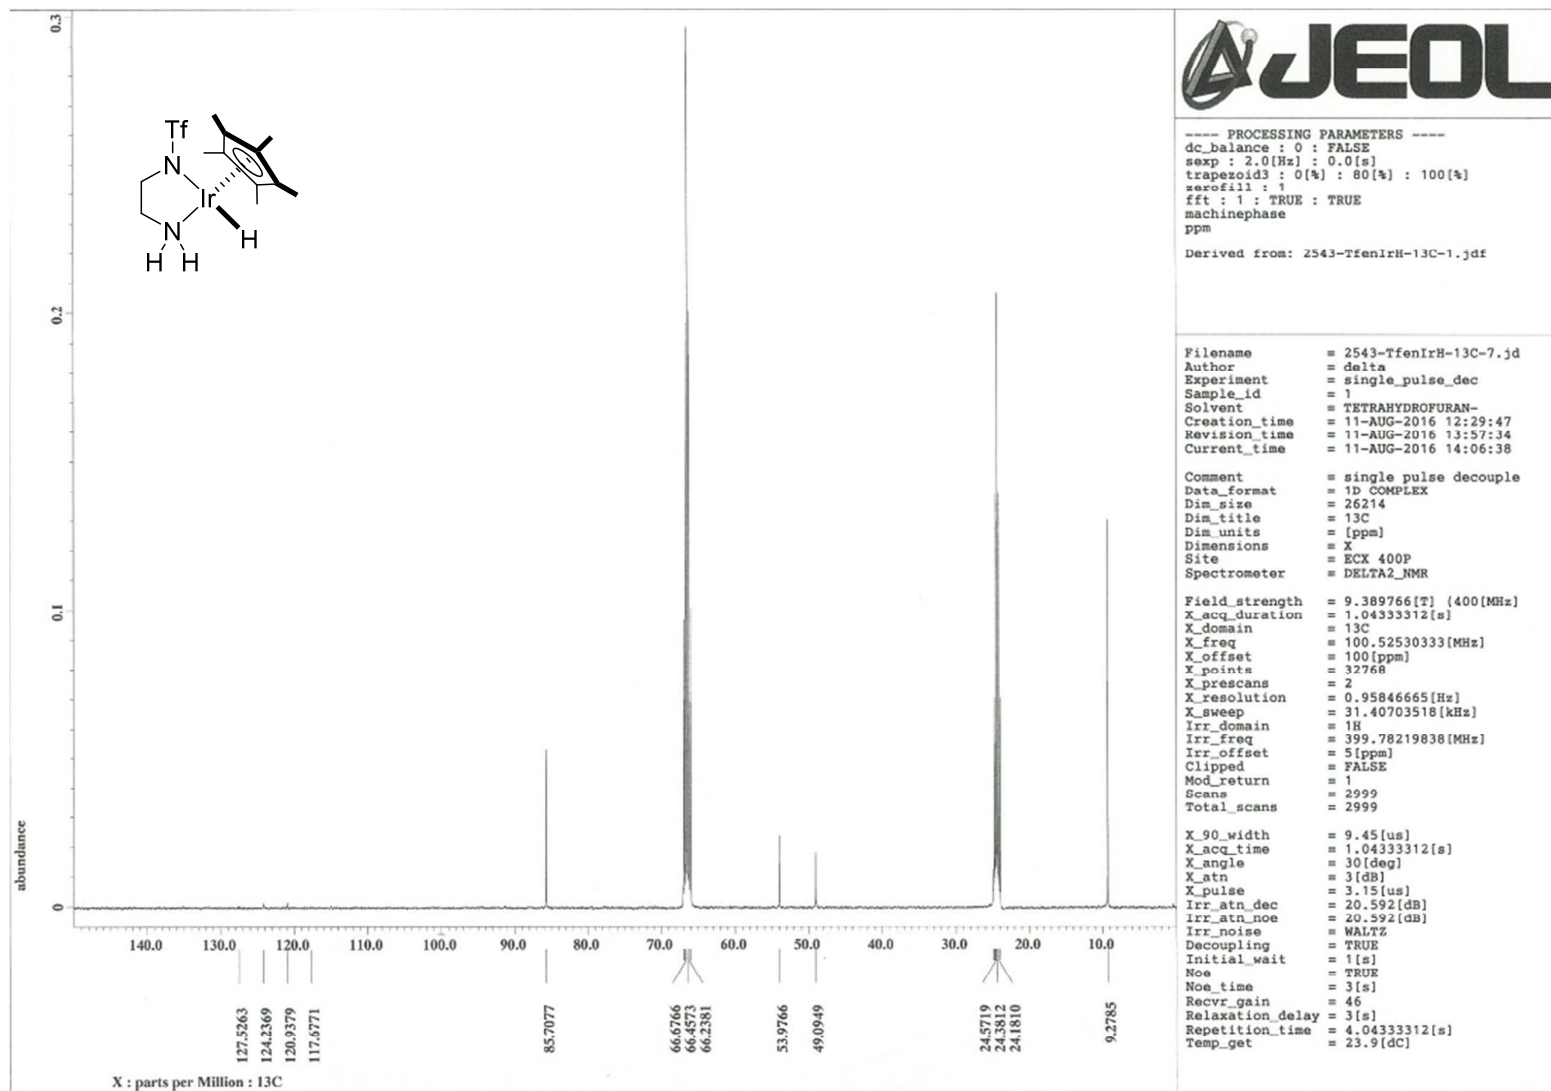

## Reference

- 1 A. Matsunami, Y. Kayaki, T. Ikariya, *Chem. Eur. J.* **2015**, *21*, 13513.
